# Supplementary material
Source: publisher figshare collection journal article supplement (https://asha.figshare.com/articles/dataset/_/6879719)
Supplement: Supplementary file 1 [file 1]

**Supplemental Material S1.** Flow diagram representing the participants included in the current study from the wider Raine cohort (Straker et al., 2017). IMQ = Infant Monitoring Questionnaire (Squires, Bricker, & Potter, 1990); CELF-3 = Clinical Evaluation of Language Fundamentals–Third Edition (Semel, Wiig, & Secord, 1995).

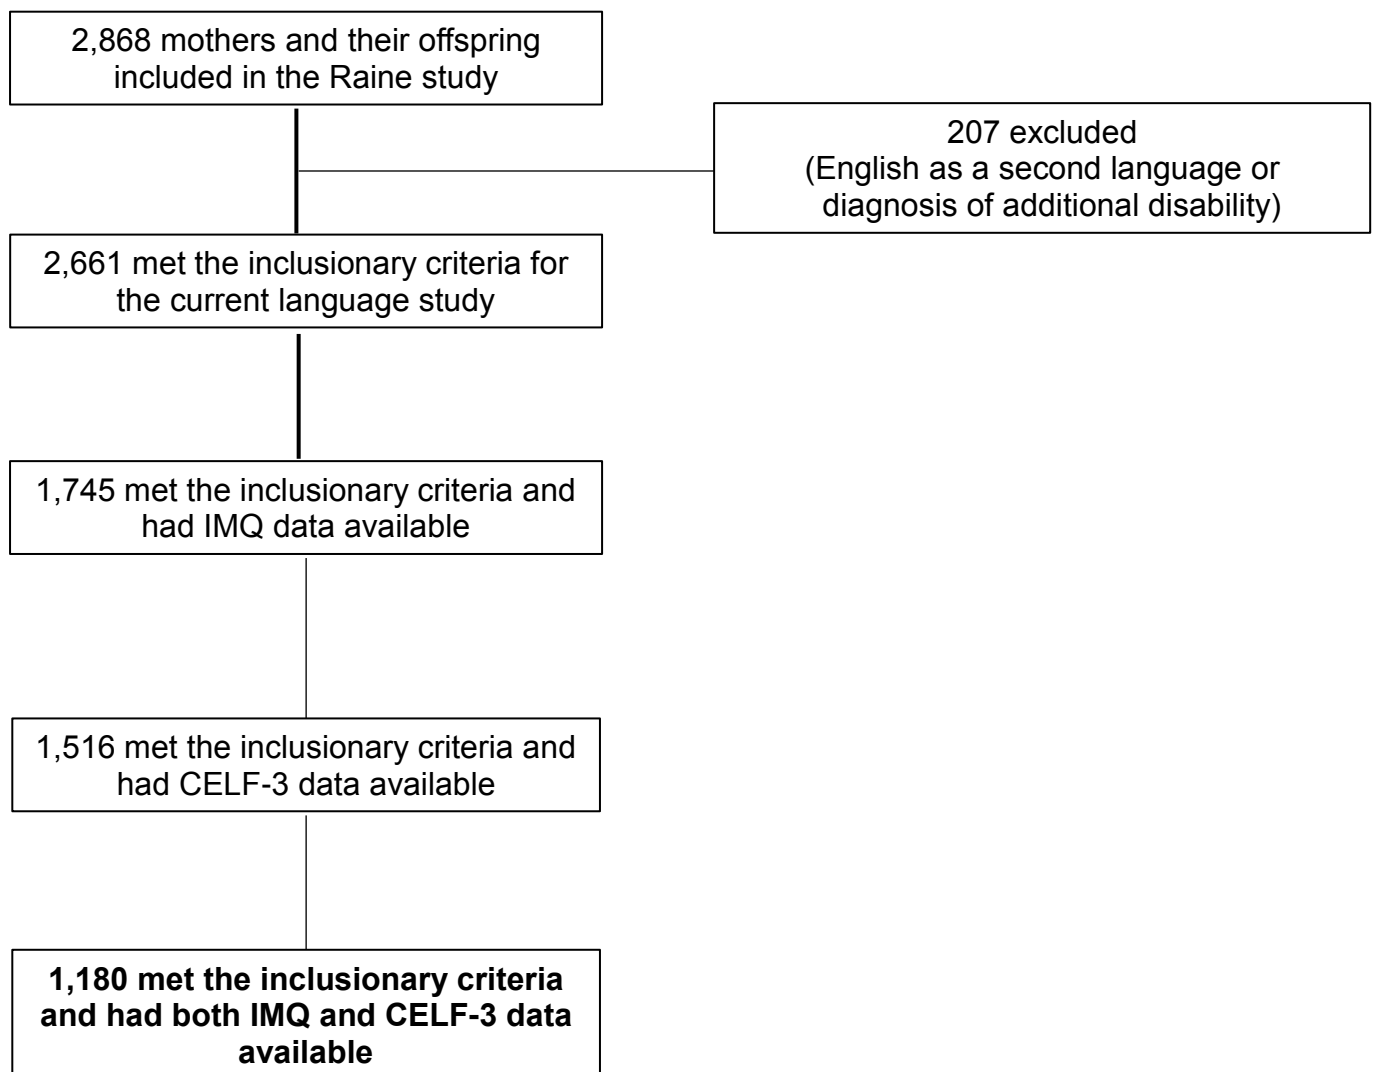

## References

- Semel, W., Wiig, E. H., & Secord, W. A. (1995). *Clinical Evaluation of Language Fundamentals–Third Edition*. San Antonio, TX: Psychological Corporation.
- Squires, J., Bricker, D., & Potter, A. (1990). *Infant/child monitoring questionnaires procedures manual*. Eugene, OR: University of Oregon.
- Straker, L., Mountain, J., Jacques, A., White, S., Smith, A., Landau, L., . . . Eastwood, P. (2017). Cohort profile: The Western Australian Pregnancy Cohort (Raine) Study–Generation 2. *International Journal of Epidemiology*, 46(5), 1384–1385j. <https://doi.org/10.1093/ije/dyw308>
