# Supplementary material
Source: publisher figshare collection journal article supplement (https://asha.figshare.com/articles/dataset/_/6879719)
Supplement: Supplementary file 2 [file 1]

**Supplemental Material S3.** Summary statistics for the typical ( $n = 1,040$ ) and delayed ( $n = 476$ ) language groups based on performance on the Infant Monitoring Questionnaire (IMQ, Squires, Bricker, & Potter, 1990) subscales at 3 years and the Clinical Evaluation of Language Fundamentals–Third Edition (CELF-3, Semel, Wiig, & Secord, 1995) at 10 years.

| Assessment                         | Typical language <sup>a</sup><br>( $n = 1,040$ ) |           |        | Delayed language <sup>a</sup><br>( $n = 476$ ) |           |        |
|------------------------------------|--------------------------------------------------|-----------|--------|------------------------------------------------|-----------|--------|
|                                    | <i>M</i>                                         | <i>SD</i> | Range  | <i>M</i>                                       | <i>SD</i> | Range  |
| Receptive Language index (CELF-3)  | 108.49                                           | 12.13     | 86–150 | 86.67                                          | 12.92     | 50–125 |
| Expressive Language index (CELF-3) | 99.58                                            | 9.09      | 86–131 | 80.07                                          | 6.72      | 53–98  |
| Communication subscale (IMQ)       | 5.58                                             | 0.51      | 2.5–6  | 5.14                                           | 0.90      | 0–6    |
| Gross Motor subscale (IMQ)         | 5.66                                             | 0.60      | 1.5–6  | 5.50                                           | 0.78      | 1–6    |
| Fine Motor subscale (IMQ)          | 5.44                                             | 0.83      | 0.5–6  | 5.15                                           | 1.08      | 1–6    |
| Adaptive subscale (IMQ)            | 5.62                                             | 0.67      | 0–6    | 5.31                                           | 0.89      | 1–6    |
| Personal-Social subscale (IMQ)     | 5.33                                             | 0.64      | 2.5–6  | 5.14                                           | 0.77      | 2–6    |

<sup>a</sup>Delayed language defined as standard scores  $< 85$  and typical language categorized as standard scores  $\geq 85$  on the CELF-3.

## References

- Semel, W., Wiig, E. H., & Secord, W. A. (1995). *Clinical Evaluation of Language Fundamentals–Third Edition*. San Antonio, TX: Psychological Corporation.
- Squires, J., Bricker, D., & Potter, A. (1990). *Infant/child monitoring questionnaires procedures manual*. Eugene, OR: University of Oregon.

Online supplemental material, Armstrong et al., "Predicting Language Difficulties in Middle Childhood From Early Developmental Milestones: A Comparison of Traditional Regression and Machine Learning Techniques," Journal of Speech, Language, and Hearing Research, [https://doi.org/10.1044/2018\\_JSLHR-L-17-0210](https://doi.org/10.1044/2018_JSLHR-L-17-0210)
