# Supplementary material
Source: publisher figshare collection journal article supplement (https://asha.figshare.com/articles/dataset/_/6879719)
Supplement: Supplementary file 3 [file 1]

**Supplemental Material S4.** Results from the adjusted multivariate logistic regression with Infant Monitoring Questionnaire (IMQ, Squires, Bricker, & Potter, 1990) communication items at 3 years.

| IMQ Communication subscale at 3 years | Typical versus delayed language at 10 years<br><i>n</i> = 1,114 |                  |
|---------------------------------------|-----------------------------------------------------------------|------------------|
|                                       | Adjusted OR (95% CI) <sup>a</sup>                               | <i>p</i> value   |
| Item 1                                |                                                                 |                  |
| Yes                                   | Reference                                                       |                  |
| Sometimes                             | 2.00 (1.28–3.13)                                                | <b>.002</b>      |
| Not yet                               | 3.32 (0.87–12.71)                                               | .079             |
| Item 2                                |                                                                 |                  |
| Yes                                   | Reference                                                       |                  |
| Sometimes                             | 6.25 (1.64–23.73)                                               | <b>.007</b>      |
| Not yet                               | — <sup>b</sup>                                                  | —                |
| Item 3                                |                                                                 |                  |
| Yes                                   | Reference                                                       |                  |
| Sometimes                             | 1.65 (0.65–4.21)                                                | .290             |
| Not yet                               | 5.28 (0.54–51.91)                                               | .153             |
| Item 4                                |                                                                 |                  |
| Yes                                   | Reference                                                       |                  |
| Sometimes                             | 1.43 (0.92–2.21)                                                | .110             |
| Not yet                               | 1.69 (0.45–6.26)                                                | .433             |
| Item 5                                |                                                                 |                  |
| Yes                                   | Reference                                                       |                  |
| Sometimes                             | 2.06 (1.01–4.21)                                                | <b>.048</b>      |
| Not yet                               | .50 (0.11–2.40)                                                 | .391             |
| Item 6                                |                                                                 |                  |
| Yes                                   | Reference                                                       |                  |
| Sometimes                             | 1.38 (0.99–1.92)                                                | .054             |
| Not yet                               | 2.13 (1.48–3.07)                                                | <b>&lt; .001</b> |

*Note.* OR = odds ratio. Bold values indicate statistical significance ( $p < .05$ ).

<sup>a</sup>All models adjusted for maternal education, income, and sex. <sup>b</sup>No participants in this category.

## Reference

Squires, J., Bricker, D., & Potter, A. (1990). *Infant/child monitoring questionnaires procedures manual*. Eugene, OR: University of Oregon.
