# Supplementary material
Source: publisher figshare collection journal article supplement (https://asha.figshare.com/articles/dataset/_/6879719)
Supplement: Supplementary file 4 [file 1]

**Supplemental Material S6.** Predictive validity of the Infant Monitoring Questionnaire (IMQ, Squires, Bricker, & Potter, 1990) on language outcomes using default machine learning parameters (percentage accuracy using  $10 \times 10$  fold cross-validation).

| Algorithm type  | Method           | Default parameters |         |
|-----------------|------------------|--------------------|---------|
|                 |                  | Communication only | All IMQ |
| Tree            | Decision         | 68.66              | 69.66   |
| Tree            | J48              | 69.69              | 69.62   |
| Tree            | J48 Consolidated | 65.91              | 64.43   |
| Tree            | Simple Cart      | 69.74              | 70.38   |
| Tree            | BFTree           | 69.26              | 70.07   |
| Tree            | REPTree          | 69.4               | 69.18   |
| Rule based      | Decision Table   | 68.75              | 68.61   |
| Rule based      | FURIA            | 69.63              | 69.38   |
| Rule based      | JRip             | 69.2               | 69.67   |
| Rule based      | PART             | 69.94              | 68.75   |
| Rule based      | Ridor            | 68.87              | 69.22   |
| Rule based      | Conjunctive      | 68.53              | 68.48   |
| Rule based      | MODLEM           | 42.98              | 64.99   |
| Rule based      | NNge             | 60.59              | 64      |
| Summary results | Overall <i>M</i> | 66.51              | 68.32   |

## Reference

Squires, J., Bricker, D., & Potter, A. (1990). *Infant/child monitoring questionnaires procedures manual*. Eugene, OR: University of Oregon.
