# Supplementary material
Source: publisher figshare collection journal article supplement (https://asha.figshare.com/articles/dataset/_/6879719)
Supplement: Supplementary file 5 [file 1]

**Supplemental Material S2.** Characteristics of participants in the Raine cohort (Straker et al., 2017) who were "included" ( $n = 1,180$ ) and "not included" ( $n = 1,481$ ) in the current study.<sup>a</sup>

| Characteristics                          | Included <sup>b</sup> | Not included <sup>b</sup> | <i>p</i> |
|------------------------------------------|-----------------------|---------------------------|----------|
|                                          | <i>n</i> (%)          | <i>n</i> (%)              |          |
| Maternal age at birth of child           |                       |                           |          |
| ≤ 19 years                               | 71 (6.1)              | 198 (13.8)                |          |
| 20–34 years                              | 907 (78.1)            | 1,085 (75.6)              |          |
| ≥ 35 years                               | 184 (15.8)            | 152 (10.6)                | < .001   |
| Maternal race                            |                       |                           |          |
| Non-Caucasian                            | 92 (7.9)              | 142 (9.9)                 |          |
| Caucasian                                | 1,070 (92.1)          | 1,293 (90.1)              | .080     |
| Maternal education                       |                       |                           |          |
| Incomplete secondary school (< 12 years) | 640 (55.1)            | 980 (68.5)                |          |
| Completed secondary school               | 522 (44.9)            | 450 (31.5)                | < .001   |
| Maternal smoking in pregnancy            |                       |                           |          |
| 1–10 daily                               | 143 (12.3)            | 284 (19.8)                |          |
| > 10 daily                               | 105 (9.0)             | 204 (14.2)                |          |
| None                                     | 914 (78.7)            | 947 (66.0)                | < .001   |
| Paternal age                             |                       |                           |          |
| ≤ 19 years                               | 32 (2.8)              | 91 (6.4)                  |          |
| 20–34 years                              | 817 (70.3)            | 1,032 (71.9)              |          |
| ≥ 35 years                               | 313 (26.9)            | 312 (21.7)                | < .001   |
| Paternal education                       |                       |                           |          |
| Incomplete secondary school (< 12 years) | 554 (54.9)            | 717 (66.9)                |          |
| Completed secondary school               | 456 (45.1)            | 354 (33.1)                | < .001   |
| Family income below poverty line         |                       |                           |          |
| Yes (< 24,000 AUD)                       | 373 (33.5)            | 682 (51.2)                |          |
| No (≥ 24,000 AUD)                        | 742 (66.5)            | 651 (48.8)                | < .001   |
| Gestational age                          |                       |                           |          |
| < 37 weeks                               | 122 (10.3)            | 173 (11.7)                |          |
| ≥ 37 weeks                               | 1,058 (89.7)          | 1,308 (88.3)              | .273     |

### Birth weight

|               |              |              |      |
|---------------|--------------|--------------|------|
| < 2,500 grams | 93 (7.9)     | 143 (9.7)    |      |
| ≥ 2,500 grams | 1,087 (92.1) | 1,328 (90.3) | .098 |

### Sex

|        |            |            |      |
|--------|------------|------------|------|
| Male   | 620 (52.5) | 738 (49.8) |      |
| Female | 560 (47.5) | 643 (50.2) | .165 |

---

*Note.* *p* values are for Chi-squared analyses. AUD = Australian dollars.

<sup>a</sup>To be "included" in the current study, participants were required to have both Infant Monitoring Questionnaire (IMQ, Squires, Bricker, & Potter, 1990) and Clinical Evaluation of Language Fundamentals–Third Edition (CELF-3, Semel, Wiig, & Secord, 1995) data available. Thus, those participants "not included" only had data available on one or neither of these measures. <sup>b</sup>Sample restricted to participants who met the inclusionary criteria for the study.

### References

- Semel, W., Wiig, E. H., & Secord, W. A. (1995). *Clinical Evaluation of Language Fundamentals–Third Edition*. San Antonio, TX: Psychological Corporation.
- Squires, J., Bricker, D., & Potter, A. (1990). *Infant/child monitoring questionnaires procedures manual*. Eugene, OR: University of Oregon.
