# Supplementary material
Source: publisher figshare collection journal article supplement (https://asha.figshare.com/articles/dataset/_/6879719)
Supplement: Supplementary file 6 [file 1]

**Supplemental Material S5.** Results from multivariate logistic regression with all Infant Monitoring Questionnaire (IMQ, Squires, Bricker, & Potter, 1990) items at 3 years.

| IMQ at 3 years <sup>a</sup> | Typical versus delayed language at 10 years<br><i>n</i> = 884 |                |
|-----------------------------|---------------------------------------------------------------|----------------|
|                             | Adjusted OR (95% CI) <sup>b</sup>                             | <i>p</i> value |
| Communication Item 1        |                                                               |                |
| Yes                         | Reference                                                     |                |
| Sometimes                   | 2.53 (1.44–4.45)                                              | <b>.001</b>    |
| Not yet                     | 7.33 (0.92–58.30)                                             | .060           |
| Communication Item 2        |                                                               |                |
| Yes                         | Reference                                                     |                |
| Sometimes                   | 7.74 (1.06–56.44)                                             | <b>.044</b>    |
| Not yet                     | — <sup>c</sup>                                                |                |
| Communication Item 3        |                                                               |                |
| Yes                         | Reference                                                     |                |
| Sometimes                   | 0.73 (0.22–2.48)                                              | .620           |
| Not yet                     | 0.39 (0.02–6.48)                                              | .511           |
| Communication Item 4        |                                                               |                |
| Yes                         | Reference                                                     |                |
| Sometimes                   | 1.18 (0.65–2.17)                                              | .585           |
| Not yet                     | 0.77 (0.10–5.80)                                              | .799           |
| Communication Item 5        |                                                               |                |
| Yes                         | Reference                                                     |                |
| Sometimes                   | 1.49 (0.59–3.81)                                              | .399           |
| Not yet                     | 0.26 (0.03–2.30)                                              | .225           |
| Communication Item 6        |                                                               |                |
| Yes                         | Reference                                                     |                |
| Sometimes                   | 1.10 (0.73–1.66)                                              | .649           |
| Not yet                     | 1.89 (1.20–2.97)                                              | <b>.006</b>    |
| Gross Motor Item 4          |                                                               |                |
| Yes                         | Reference                                                     |                |
| Sometimes                   | 0.96 (0.53–1.73)                                              | .883           |
| Not yet                     | 1.16 (0.36–3.71)                                              | .809           |
| Gross Motor Item 5          |                                                               |                |
| Yes                         | Reference                                                     |                |
| Sometimes                   | 0.72 (0.28–1.87)                                              | .507           |
| Not yet                     | 0.74 (0.11–5.06)                                              | .759           |
| Gross Motor Item 6          |                                                               |                |
| Yes                         | Reference                                                     |                |
| Sometimes                   | 2.18 (1.15–4.11)                                              | <b>.016</b>    |
| Not yet                     | 3.01 (0.81–11.19)                                             | .100           |
| Fine Motor Item 1           |                                                               |                |
| Yes                         | Reference                                                     |                |
| Sometimes                   | 0.37 (0.12–1.09)                                              | .071           |
| Not yet                     | 0.69 (0.16–2.94)                                              | .620           |
| Fine Motor Item 2           |                                                               |                |
| Yes                         | Reference                                                     |                |
| Sometimes                   | 1.52 (0.59–3.92)                                              | .390           |
| Not yet                     | 0.80 (0.21–3.02)                                              | .747           |

|                        |                   |                  |
|------------------------|-------------------|------------------|
| Fine Motor Item 3      |                   |                  |
| Yes                    | Reference         |                  |
| Sometimes              | 3.56 (1.73–7.31)  | <b>.001</b>      |
| Not yet                | 1.96 (0.62–6.19)  | .252             |
| Fine Motor Item 6      |                   |                  |
| Yes                    | Reference         |                  |
| Sometimes              | 1.03 (0.60–1.78)  | .905             |
| Not yet                | 2.03 (0.94–4.37)  | .072             |
| Adaptive Item 1        |                   |                  |
| Yes                    | Reference         |                  |
| Sometimes              | 1.63 (0.61–4.39)  | .331             |
| Not yet                | 1.13 (0.69–1.86)  | .630             |
| Adaptive Item 2        |                   |                  |
| Yes                    | Reference         |                  |
| Sometimes              | 0.33 (0.12–0.89)  | <b>.028</b>      |
| Not yet                | 0.47 (0.13–1.72)  | .251             |
| Adaptive Item 3        |                   |                  |
| Yes                    | Reference         |                  |
| Sometimes              | 3.48 (1.74–6.97)  | <b>&lt; .001</b> |
| Not yet                | 3.96 (1.84–8.53)  | <b>&lt; .001</b> |
| Adaptive Item 4        |                   |                  |
| Yes                    | Reference         |                  |
| Sometimes              | 1.87 (0.90–3.88)  | .094             |
| Not yet                | 1.01 (0.20–5.07)  | .994             |
| Adaptive Item 5        |                   |                  |
| Yes                    | Reference         |                  |
| Sometimes              | 0.78 (0.38–1.61)  | .497             |
| Not yet                | 0.70 (0.19–2.54)  | .584             |
| Personal-Social Item 1 |                   |                  |
| Yes                    | Reference         |                  |
| Sometimes              | 1.47 (0.46–4.77)  | .518             |
| Not yet                | 1.07 (0.19–6.11)  | .937             |
| Personal-Social Item 2 |                   |                  |
| Yes                    | Reference         |                  |
| Sometimes              | 2.55 (1.13–5.77)  | <b>.025</b>      |
| Not yet                | 4.74 (1.59–14.16) | <b>.005</b>      |
| Personal-Social Item 6 |                   |                  |
| Yes                    | Reference         |                  |
| Sometimes              | 0.81 (0.56–1.17)  | .266             |
| Not yet                | 0.37 (0.08–1.57)  | .176             |

Note. OR = odds ratio. Bold values indicate statistical significance ( $p < .05$ ).

<sup>a</sup>Only includes items from the IMQ that were significant in chi-square analyses. <sup>b</sup>All models adjusted for maternal education, income, and sex. <sup>c</sup>No participants in this category.

## Reference

Squires, J., Bricker, D., & Potter, A. (1990). *Infant/child monitoring questionnaires procedures manual*. Eugene, OR: University of Oregon.
